# Supplementary material for: Validation of a high-throughput method for the quantification of flavanol and procyanidin biomarkers and methylxanthines in plasma by UPLC-MS
Source: Royal Society of Chemistry journal article supplement (doi:10.1039/d1fo01228b), 2021-01-01
Supplement: d1fo01228b1.pdf [file d1fo01228b1.pdf]

## Electronic supplementary information

Validation of a high-throughput method for the quantification of flavanol  
and procyanidins biomarkers and methylxanthines in plasma by UPLC-  
MS

Reedmond Y. Fong<sup>a</sup>, Gunter G. C. Kuhnle<sup>b</sup>, Alan Crozier<sup>a,c</sup>,  
Hagen Schroeter<sup>d</sup>, Javier I. Ottaviani<sup>d\*</sup>

<sup>a</sup>*Department of Nutrition, University of California, Davis, CA 95616, USA*

<sup>b</sup>*Department of Food and Nutritional Sciences, University of Reading, Reading, UK.*

<sup>c</sup>*Department of Chemistry, King Saud University, Riyadh 11451, Saudi Arabia*

<sup>d</sup>*Mars Incorporated, McLean, VA,, USA*

\*Corresponding author at Department of Nutrition, University of California, Davis, CA  
95616, USA

*E-mail address: Javier.Ottaviani @effem.com (J.I. Ottaviani)*

## Supplementary Study design

Healthy male and female adults were recruited by public advertisement in the city of Davis and surrounding areas (California, USA). Exclusion criteria included a body mass index (BMI) higher than 30 kg/m<sup>2</sup>, blood pressure (BP) higher than 140/90 mmHg, allergies to peanut or cocoa, avoidance of caffeinated food products and beverages, a history of cardiovascular disease (CVD), stroke, renal, hepatic, or thyroid disease, gastrointestinal (GI) tract disorders, previous GI surgery (except appendectomy), the current intake of herbal-, plant- or botanicals-containing dietary supplements, persons following a vegan/vegetarian diet, and those adhering to an uncommon diet or a weight loss program. To determine eligibility, participants were asked to complete health and lifestyle questionnaires, have their height, weight, and in-office BP determined, and to provide a blood sample for complete blood count (CBC), liver panel, lipid panel and metabolic panel assessments. Enrolled participants commenced the study protocol between 1-3 weeks after eligibility was determined. Participants characteristics are shown in Table S0.

Volunteers were recruited for three different studies that aimed at collecting plasma samples for method validation and application. These studies included: i) sample collection for method validation; ii) Sample collection for method application after single acute intake of flavanol- and methylxanthine-containing material; iii) Sample collection for method application after daily intake of flavanol- and methylxanthine-containing material. A summary of the procedures involved in each study is provided in Scheme I.

**Table S0:** Characteristics of volunteers participating in the different studies

| Parameters                                | Studies              |                                                                             |                                                                        |
|-------------------------------------------|----------------------|-----------------------------------------------------------------------------|------------------------------------------------------------------------|
|                                           | i. Method validation | Method application                                                          |                                                                        |
|                                           |                      | ii. Single acute intake of flavanol- and methylxanthine-containing material | iii. Daily intake of flavanol- and methylxanthine-containing material. |
| <b>n (f/m)</b>                            | 7 (4/3)              | 7 (4/3)                                                                     | 7 (3/4)                                                                |
| <b>Age (y)</b>                            | 37±7                 | 33±6                                                                        | 46±9                                                                   |
| <b>Weight (Kg)</b>                        | 69±9                 | 74±12                                                                       | 79±13                                                                  |
| <b>Body-mass index (Kg/m<sup>2</sup>)</b> | 23±1                 | 26±3                                                                        | 26±3                                                                   |
| <b>Systolic blood pressure (mmHg)</b>     | 120±11               | 124±10                                                                      | 122±9                                                                  |
| <b>Diastolic blood pressure (mmHg)</b>    | 76±7                 | 80±7                                                                        | 78±10                                                                  |
| <b>Heart rate (bpm)</b>                   | 62±14                | 61±10                                                                       | 64±5                                                                   |
| <b>Total cholesterol (mg/dL)</b>          | 151±29               | 188±36                                                                      | 202±40                                                                 |
| <b>HDL (mg/dL)</b>                        | 56±13                | 54±54                                                                       | 52±9                                                                   |

In the case of studies for method validation and for method application after single acute intake of flavanol- and methylxanthine-containing material, volunteers were asked to follow a low flavanol diet 24 h prior sample collection. To accomplish this, volunteers were instructed on how to follow a low-flavanol and procyanidin diet, receiving a list of suggested foods containing low or negligible amounts of flavanols and procyanidins. Volunteers were allowed to consume one 8 oz-cup of coffee the morning prior to the study day but refrained from consuming coffee or other methylxanthine-containing beverages during the rest of the day prior and during study visits. Given that recruited volunteers per inclusion/exclusion criteria were regular consumers of caffeine/theobromine-containing foods and beverages, a longer dietary restriction was deemed unnecessary given the inconvenience this would represent to volunteers. Finally, volunteers were asked to refrain from consuming alcohol the day prior to and during the study visit to. Volunteers were asked to fast for 12 h before each study day (water ad libitum).

**i. Sample collection for method validation**

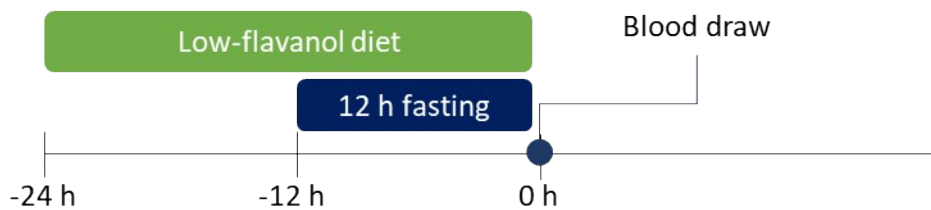

**ii. Sample collection for method application after single acute intake of flavanol- and methylxanthine-containing material**

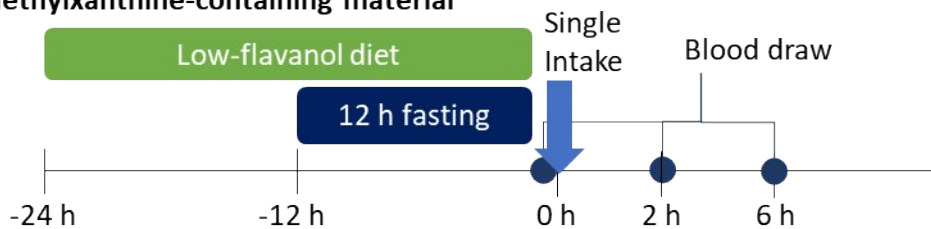

**iii. Sample collection for method application after daily intake of flavanol- and methylxanthine-containing material**

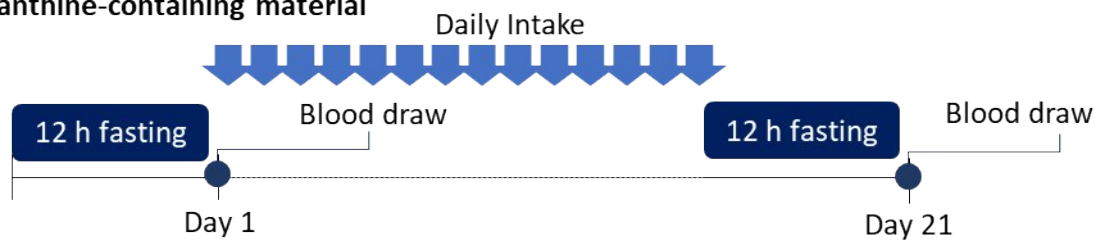

**Scheme I:** description of study designs for the sample collection for method validation and application.

**Table S1:** Composition and concentration of working solutions.

| Analytes in each working solution                   | Concentration of working solutions ( $\mu\text{M}$ ) |     |     |     |      |
|-----------------------------------------------------|------------------------------------------------------|-----|-----|-----|------|
|                                                     | WS1                                                  | WS2 | WS3 | WS4 | WS5  |
| SREMs (EC-3'S, EC-3'GlcUA, 3'Me-EC-5S) <sup>a</sup> | 0.1                                                  | 0.5 | 1   | 5   | 10   |
| gVLMs (4'OH-VL-3'S, 4'OH-VL-3'GlcUA) <sup>b</sup>   | 0.1                                                  | 0.5 | 1   | 5   | 10   |
| MXs (Tb, Cf) <sup>c</sup>                           | 10                                                   | 50  | 100 | 500 | 1000 |

<sup>a</sup>(-)-epicatechin-3'-sulfate, EC-3'S; (-)-epicatechin-3'-glucuronide, EC-3'-GlcUA, 3'-methoxy-(-)-epicatechin-5-sulfate (3'-Me-EC-5S)

<sup>b</sup>5-(4'-hydroxyphenyl)- $\gamma$ -valerolactone-3'-sulfate, 4'OH-VL-3'S; 5-(4'-hydroxyphenyl)- $\gamma$ -valerolactone-3'-glucuronide (4'OH-VL-3'-GlcUA). <sup>c</sup>theobromine, Tb; caffeine, Caf.

**Table S2:** Concentrations of individual structurally- related (-)-epicatechin metabolites (SREMs), 5-(phenyl)- $\gamma$ -valerolactone metabolites (gVLM) and methylxanthines (MXs) in plasma samples after mixing SREM- and gVLM-free pooled plasma samples with working solutions WS1-5<sup>a</sup>.

| Analytes                         | Concentration of analytes in plasma samples (n=4) |                 |                 |               |               |                |
|----------------------------------|---------------------------------------------------|-----------------|-----------------|---------------|---------------|----------------|
|                                  | P0                                                | PS1<br>(<LLOQ)* | PS2<br>(>LLOQ)* | PS3<br>(Low)* | PS4<br>(Mid)* | PS5<br>(High)* |
| Individual SREMs (nM)            | –                                                 | 2.86            | 14.3            | 28.6          | 143           | 286            |
| Individual gVLMs (nM)            | –                                                 | 2.86            | 14.3            | 28.6          | 143           | 286            |
| Individual MXs ( $\mu\text{M}$ ) | –                                                 | 0.286           | 1.43            | 2.86          | 14.3          | 28.6           |

\*Concentrations selected based on the levels of SREMs and gVLMs expected in plasma samples collected after overnight fasting; Lowest Level of Quantification (LLOQ).

**Table S3:** Concentration of structurally- related (-)-epicatechin metabolites (SREMs), 5-(phenyl)- $\gamma$ -valerolactone metabolites (gVLM) and methylxanthines (MXs) in quality controls samples used to assess precision of the method.

|                                | Concentration              |                           |                            |
|--------------------------------|----------------------------|---------------------------|----------------------------|
|                                | QC- $\alpha$<br>(nM)       | QC- $\beta$<br>(nM)       | QC- $\gamma$<br>(nM)       |
| <b>SREMs/gVLMs<sup>a</sup></b> |                            |                           |                            |
| EC-3'-GlcUA                    | 17                         | 570                       | 451                        |
| EC-3'S                         | 57                         | 2870                      | 1933                       |
| 3'Me-EC-5S                     | 371                        | 2809                      | 1492                       |
| 4'OH-VL-3'S                    | 2931                       | 4499                      | 3149                       |
| 4'-OH-VL-3'GlcUA               | 286                        | 313                       | 263                        |
|                                | QC- $\alpha$<br>( $\mu$ M) | QC- $\beta$<br>( $\mu$ M) | QC- $\gamma$<br>( $\mu$ M) |
| <b>MXs<sup>b</sup></b>         |                            |                           |                            |
| Tb                             | 8.09                       | 9.57                      | 4.13                       |
| Caf                            | 18.4                       | 18.6                      | 16.4                       |

<sup>a</sup>(-)-epicatechin-3'-sulfate (EC-3'S); (-)-epicatechin-3'-glucuronide (EC-3'-GlcUA); 3'-methoxy(-)-epicatechin-5-sulfate (3'-Me-EC-5S); (4'-hydroxyphenyl)- $\gamma$ -valerolactone-3'-sulfate (VL-3'S); 5-(4'-hydroxyphenyl)- $\gamma$ -valerolactone-3'-glucuronide (VL-3'-GlcUA)

<sup>b</sup>theobromine (Tb); caffeine (Caf)

**Table S4:** Composition and concentration of structurally- related (-)-epicatechin metabolites (SREMs), 5-(phenyl)-  $\gamma$  -valerolactone metabolites (gVLM), methylxanthines (MXs) and internal standards (ISTD) in standard curve and suitability test solution.

| Analytes in each working solution <sup>a</sup> | Concentration of standard curve <sup>b</sup> |         |         |         |         |         |         |         | ISTD solution |
|------------------------------------------------|----------------------------------------------|---------|---------|---------|---------|---------|---------|---------|---------------|
|                                                | Suitability test solution                    | Level 1 | Level 2 | Level 4 | Level 5 | Level 6 | Level 7 | Level 8 |               |
| SREMs (EC-3'S, EC-3'G, 3'Me-EC-5S; nM)         | 10                                           | 25      | 50      | 100     | 250     | 500     | 1000    | 2500    | 600           |
| gVLMs (4'OH-VL-3'S, 4'OH-VL-3'GlcUA; nM)       | 10                                           | 25      | 50      | 100     | 250     | 500     | 1000    | 2500    | 600           |
| MXs (Tb, Caf; $\mu$ M)                         | 0.8                                          | 2       | 4       | 8       | 20      | 40      | 80      | 200     | 6             |

<sup>a</sup>(-)-epicatechin-3'-sulfate (EC-3'S); (-)-epicatechin-3'-glucuronide (EC-3'-GlcUA); 3'-methoxy(-)-epicatechin-5-sulfate (3'Me-EC-5S); 5-(4'-hydroxyphenyl)- $\gamma$ -valerolactone-3'-sulfate (4'-OH-VL-3'S) 5-(4'-hydroxyphenyl)- $\gamma$ -valerolactone-3'-glucuronide (4'OH-VL-3'-GlcUA); theobromine (Tb); caffeine (Caf)

<sup>b</sup>Working solutions used for preparing standard curve had a 10x concentration compared to concentration of the standard curve listed in the Table. Given the concentration of the sample during sample preparation, the concentrations of the analytes in the standard curve represent 3.5x the concentration detected in plasma (e.g. 25 nM = 7.14 nM)

**Table S5** UPLC settings and mobile phase gradient.

| Time<br>(min) | Mobile phase A<br>(%) | Mobile phase B<br>(%) | Flow rate<br>(ml/min) |
|---------------|-----------------------|-----------------------|-----------------------|
| 0.0           | 95                    | 5                     | 0.5                   |
| 2.0           | 95                    | 5                     | 0.5                   |
| 3.5           | 85                    | 15                    | 0.5                   |
| 6.5           | 80                    | 20                    | 0.5                   |
| 6.6           | 5                     | 95                    | 0.5                   |
| 7.1           | 5                     | 95                    | 0.5                   |
| 8.0           | 95                    | 5                     | 0.5                   |

**Table S6:** Mass spectrometer tune parameters for positive and negative ionization modes.

| Parameter                    | Positive Mode | Negative Mode |
|------------------------------|---------------|---------------|
| Capillary (kV)               | 4.0           | 3.1           |
| Extractor (V)                | 3             | 3             |
| RF Lens (V)                  | 3.0           | 2.0           |
| LM Resolution 1              | 13.0          | 11.0          |
| HM Resolution 1              | 8.0           | 10.0          |
| Ion Energy 1                 | 0.5           | 0.5           |
| LM Resolution 2              | 10.0          | 10.0          |
| HM Resolution 2              | 8.0           | 8.0           |
| Ion Energy 2                 | 2.0           | 2.0           |
| Source Temperature (°C)      | 150           | 150           |
| Desolvation Temperature (°C) | 500           | 500           |
| Desolvation Flow (L/h)       | 1000          | 1000          |
| Cone Flow (L/h)              | 0             | 0             |
| Multiplier                   | 900           | 900           |



**Table S7:** Negative ionization MRM transitions, dwell time, cone energy, collision energy, time interval for data collection, and retention time of analytes.

| Compound <sup>a</sup>                                                      | Parent<br>( <i>m/z</i> ) | Daughter<br>( <i>m/z</i> ) | Dwell<br>(s) | Cone<br>(V) | Collision<br>(V) | Time<br>Interval<br>(min) | Retention<br>Time<br>(min) |
|----------------------------------------------------------------------------|--------------------------|----------------------------|--------------|-------------|------------------|---------------------------|----------------------------|
| EC-3'GlcUA                                                                 | 465.5                    | 289                        | 0.25         | 22          | 20               | 3.8 – 4.6                 | 4.2                        |
| EC-3'S                                                                     | 369.4                    | 289                        | 0.25         | 25          | 20               | 4.1 – 6.5                 | 4.6                        |
| 3'Me-EC-5S                                                                 | 383.5                    | 303                        | 0.25         | 25          | 22               | 4.1 – 6.5                 | 4.9                        |
| 4'OH-VL-3'S                                                                | 287.1                    | 207                        | 0.005        | 20          | 17               | 3.8 – 4.6                 | 4.2                        |
| 3'-OH-VL-4'GlcUA                                                           | 383.5                    | 207.1                      | 0.05         | 25          | 25               | 3.8 – 4.6                 | 3.8                        |
| 4'OH-VL-3'GlcUA                                                            | 383.5                    | 207.1                      | 0.05         | 25          | 25               | 3.8 – 4.6                 | 4.1                        |
| [ <sup>2</sup> H <sub>2</sub> / <sup>2</sup> H <sub>3</sub> ]EC-3'-GlcUA   | 468                      | 291                        | 0.25         | 22          | 18               | 3.8 – 4.6                 | 4.2                        |
| [ <sup>13</sup> C <sub>2</sub> , <sup>2</sup> H <sub>2</sub> ]4'-OH-VL-3'S | 291.5                    | 211                        | 0.01         | 25          | 20               | 3.8 – 4.6                 | 4.2                        |

<sup>a</sup>(-)-epicatechin-3'-sulfate, EC-3'S; (-)-epicatechin-3'-glucuronide, EC-3'-GlcUA, 3'-methoxy(-)-epicatechin-5-sulfate (3'-Me-EC-5S).

<sup>b</sup>5-(4'-hydroxyphenyl)- $\gamma$ -valerolactone-3'-sulfate, 4'OH-VL-3'S; 5-(4'-hydroxyphenyl)- $\gamma$ -valerolactone-3'-glucuronide (4'OH-VL-3'-GlcUA); 5-(3'-hydroxyphenyl)- $\gamma$ -valerolactone-4'-glucuronide (3'OH-VL-4'-GlcUA).

**Table S8:** Positive ionization MRM transitions, dwell time, cone energy, collision energy, time interval for data collection, and retention time of analyte(s).

| Compound <sup>a</sup>               | Parent<br>( <i>m/z</i> ) | Daughter<br>( <i>m/z</i> ) | Dwell<br>(s) | Cone<br>(V) | Collision<br>(V) | Time Interval<br>(min) | Retention Time<br>(min) |
|-------------------------------------|--------------------------|----------------------------|--------------|-------------|------------------|------------------------|-------------------------|
| Tb                                  | 181.2                    | 134.9                      | 0.4          | 25          | 15               | 1 – 2.25               | 1.6                     |
| Ca                                  | 195.2                    | 138                        | 0.005        | 18          | 15               | 3.5 – 4.2              | 3.8                     |
| [ <sup>2</sup> H <sub>6</sub> ]Tb   | 187.2                    | 141.1                      | 0.2          | 25          | 18               | 1 – 2.25               | 1.6                     |
| [ <sup>13</sup> C <sub>3</sub> ]Caf | 198.5                    | 139.9                      | 0.005        | 20          | 15               | 3.5 – 4.2              | 3.8                     |

<sup>a</sup>theobromine, Tb; caffeine, Caf.

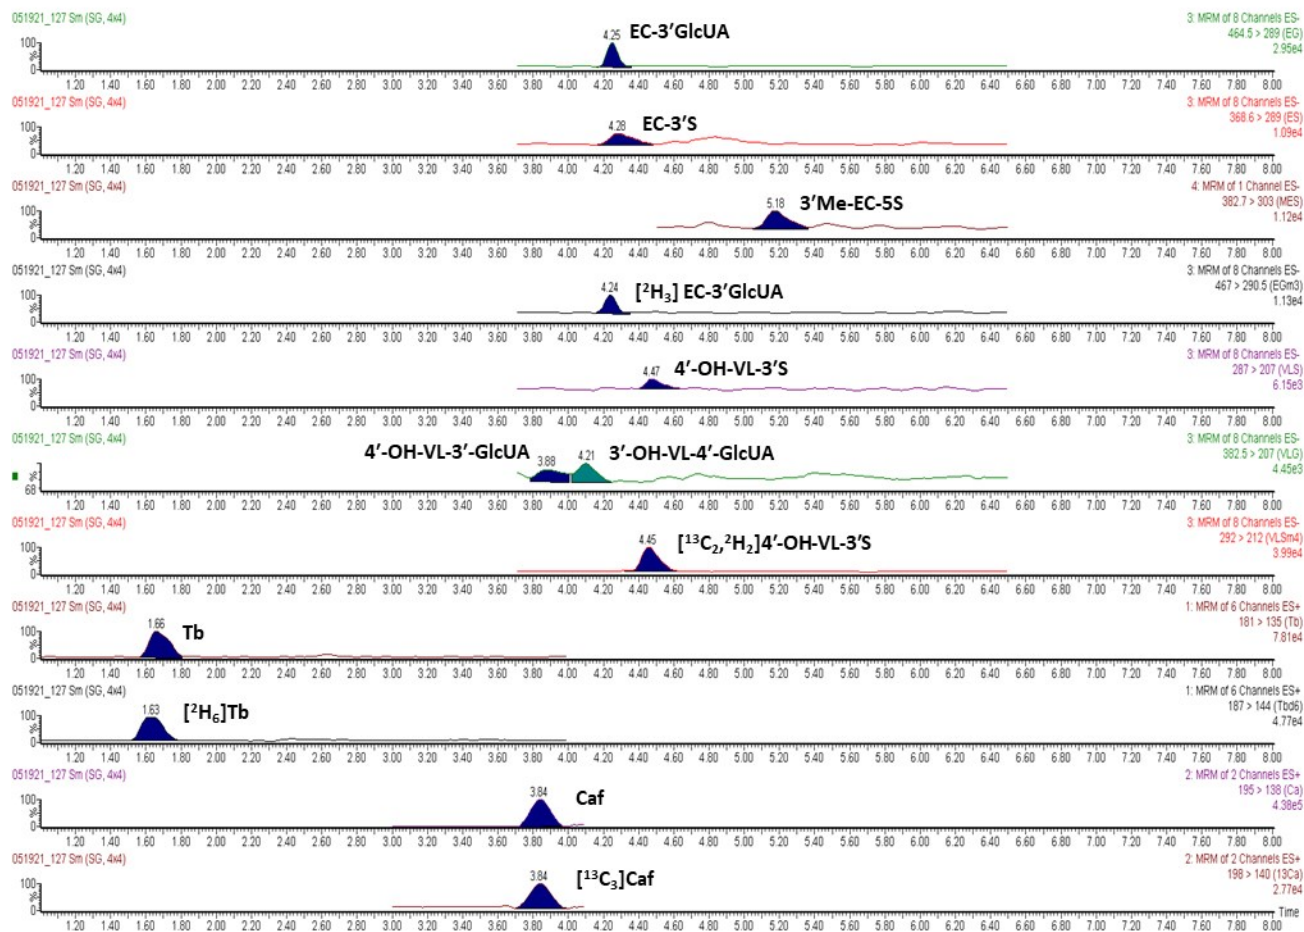

**Figure S1:** Chromatogram traces of a mixture of analytical standards, including (–)-epicatechin-3'-glucuronide (EC-3'GlcUA); (–)-epicatechin-3'-sulfate (EC-3'S); 3'-methoxy-(–)-epicatechin-5-sulfate (3'Me-EC-5S), 5-(4'-hydroxyphenyl)-γ-valerolactone-3'-sulfate (4'-OH-VL-3'S); 5-(4'-hydroxyphenyl)-γ-valerolactone-3'-glucuronide (4'-OH-VL-3'-GlcUA), 5-(3'-hydroxyphenyl)-γ-valerolactone-4'-glucuronide (3'-OH-VL-4'-GlcUA), theobromine (Tb) and caffeine (Caf). The mixture of analytical standards contained SREMs and gVLMs at 1 μM and MXs at 80 μM, volume of injection was 5 μL.

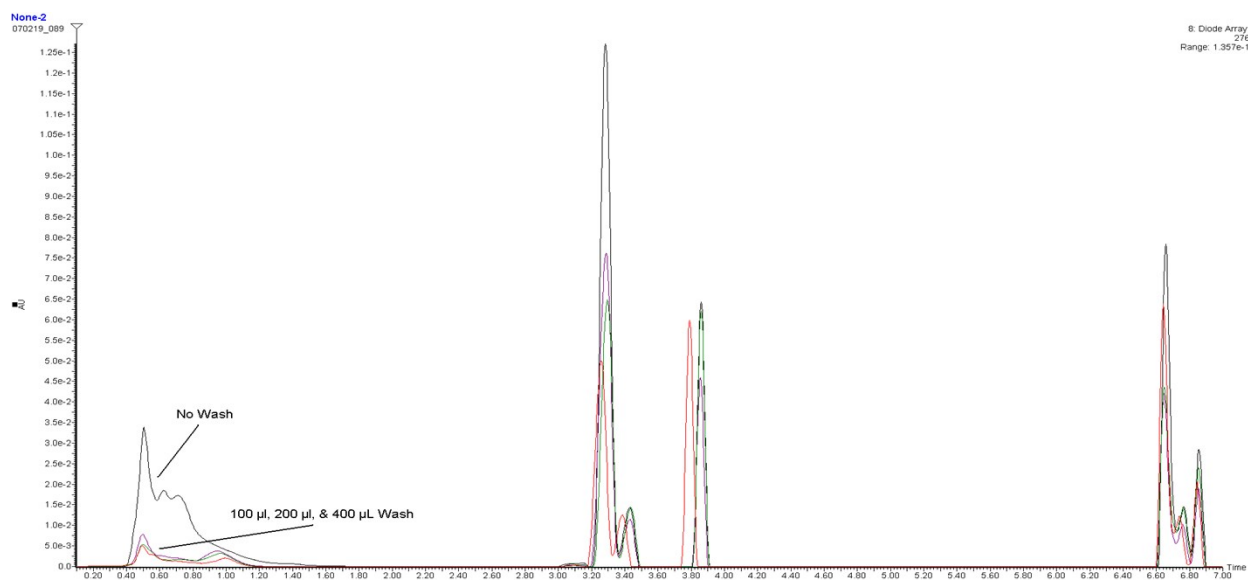

**Figure S2:** UV-chromatogram traces of plasma samples prepared with different volumes of washing solution. The differences among these chromatogram traces depict the amount of material loaded to the column and removed with the different washing conditions tested.
